# Supplementary material for: A multifunctional gold doped Co(OH)2electrocatalyst tailored for water oxidation, oxygen reduction, hydrogen evolution and glucose detection
Source: Royal Society of Chemistry journal article supplement (doi:10.1039/c7ta08928g), 2017-01-01
Supplement: c7ta08928g1.pdf [file c7ta08928g1.pdf]

### Electronic Supplementary Information

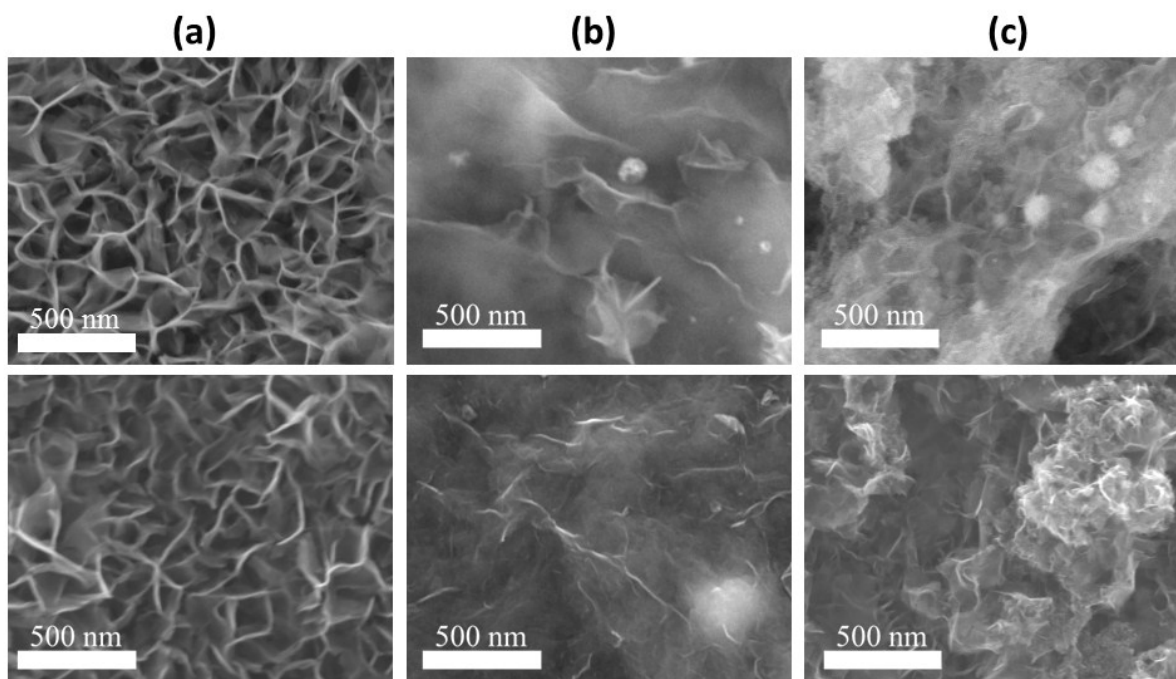

**Fig. S1.** SEM images of Au-Co(OH)<sub>2</sub>/GC electrodeposited film as a function of Au concentration in 10 mM Co(NO<sub>3</sub>)<sub>2</sub>·6H<sub>2</sub>O, (a) 0 mM Au, (b) 0.1 mM Au and (c) 1 mM Au at constant -1.05 V potential applied. SEM of as deposited film (first row) and after 5 cycles in OER region (second row).

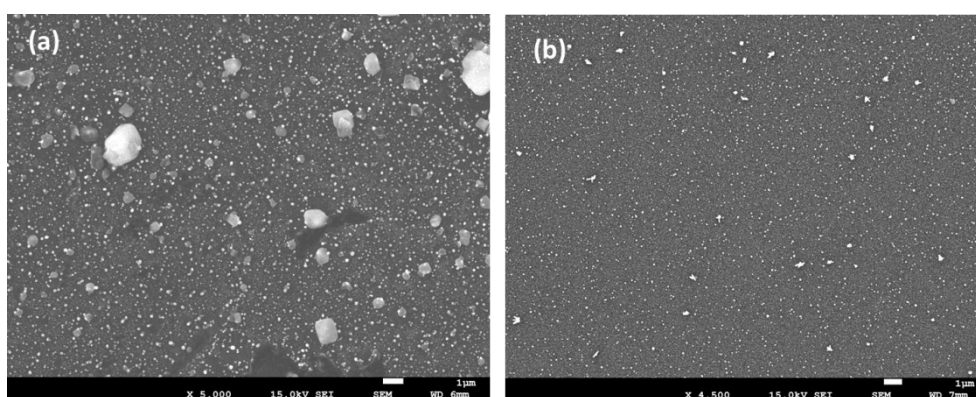

**Fig. S2.** SEM images of Au electrodeposited on GC from 0.5 mM KAuBr<sub>4</sub> for 150 s at -1.05 V before (a) and after (b) OER.

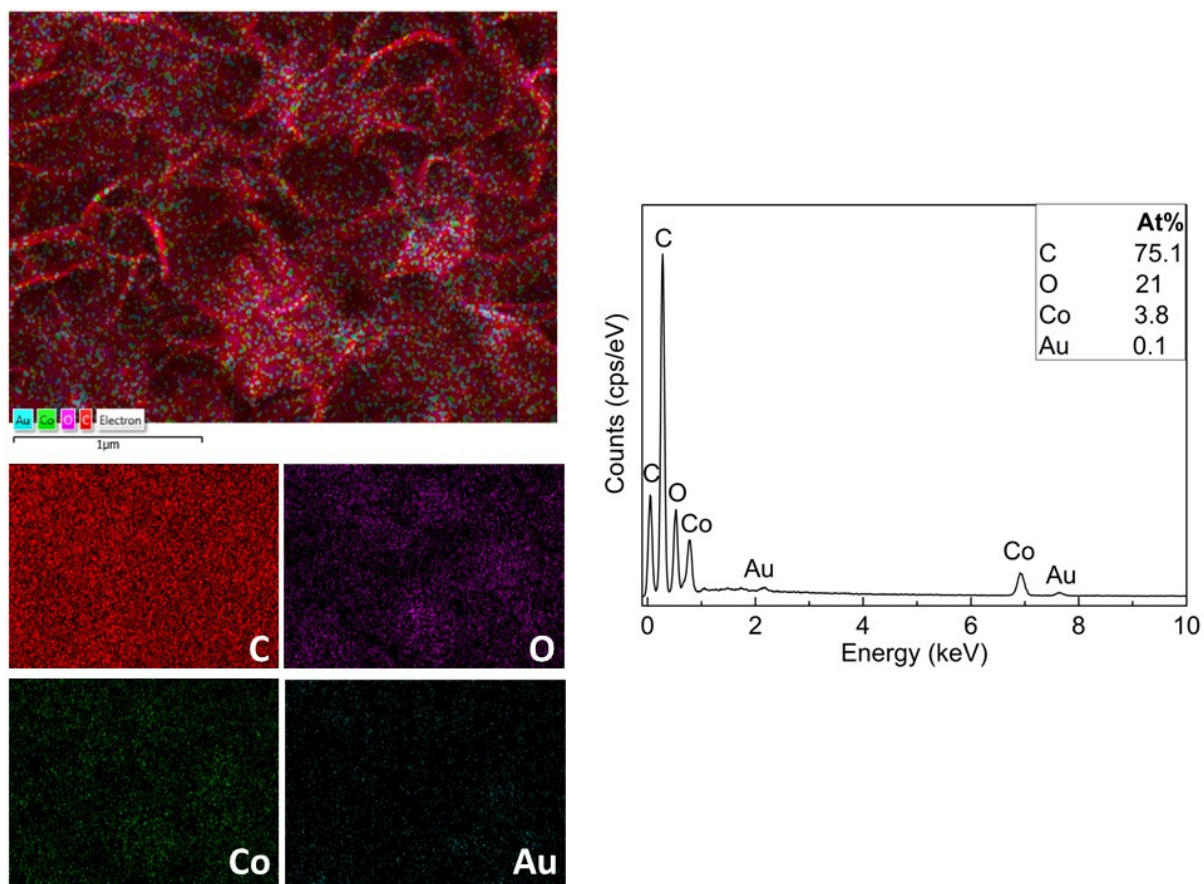

**Fig. S3.** SEM-EDS mapping of Au/Co(OH)<sub>2</sub> electrodeposited from 0.1 mM KAuBr<sub>4</sub> - 10 mM Co(NO<sub>3</sub>)<sub>2</sub>·6H<sub>2</sub>O solution on GC electrode for 150 sec at -1.05 V.

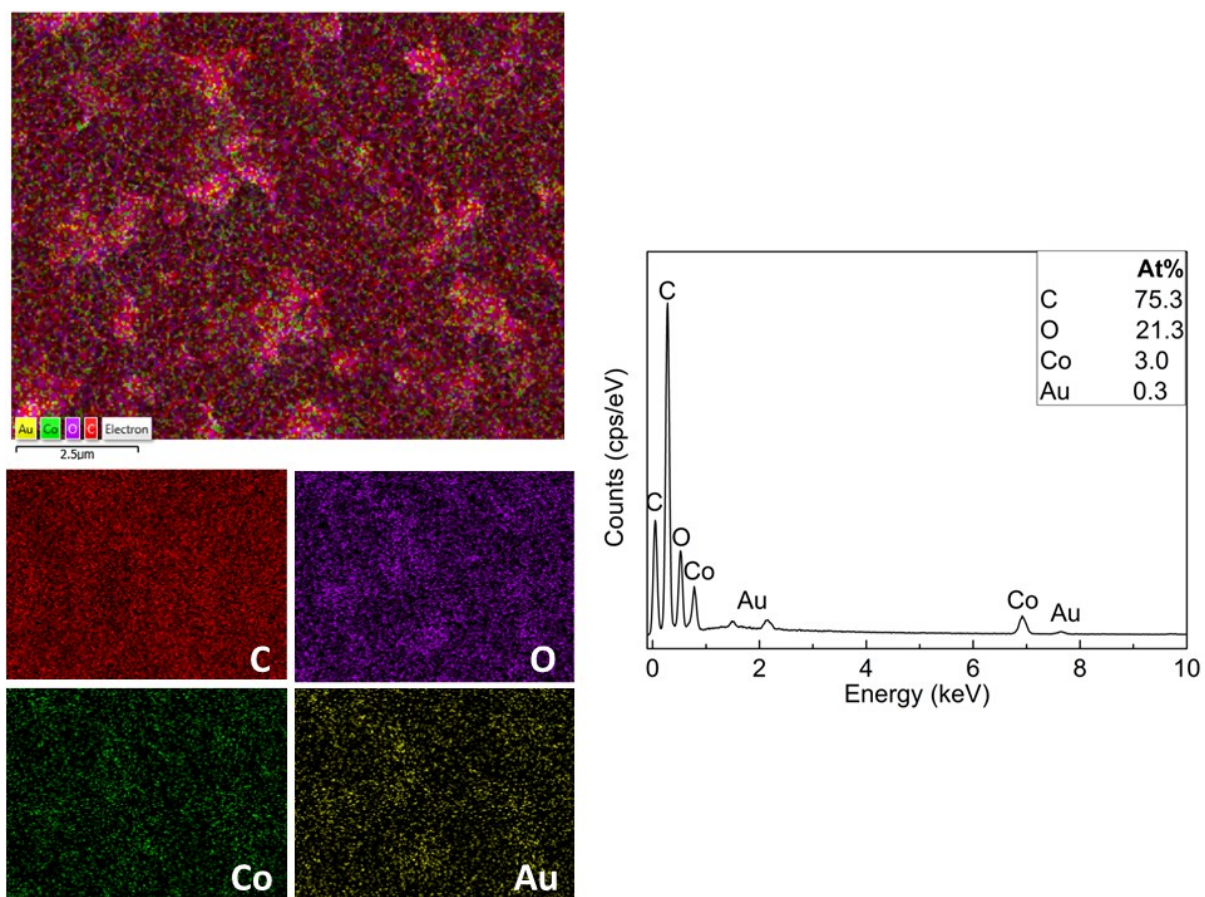

**Fig. S4:** SEM-EDS mapping of Au/Co(OH)<sub>2</sub> electrodeposited from 0.5 mM KAuBr<sub>4</sub> - 10 mM Co(NO<sub>3</sub>)<sub>2</sub>·6H<sub>2</sub>O solution on a GC electrode for 150 sec at -1.05 V.

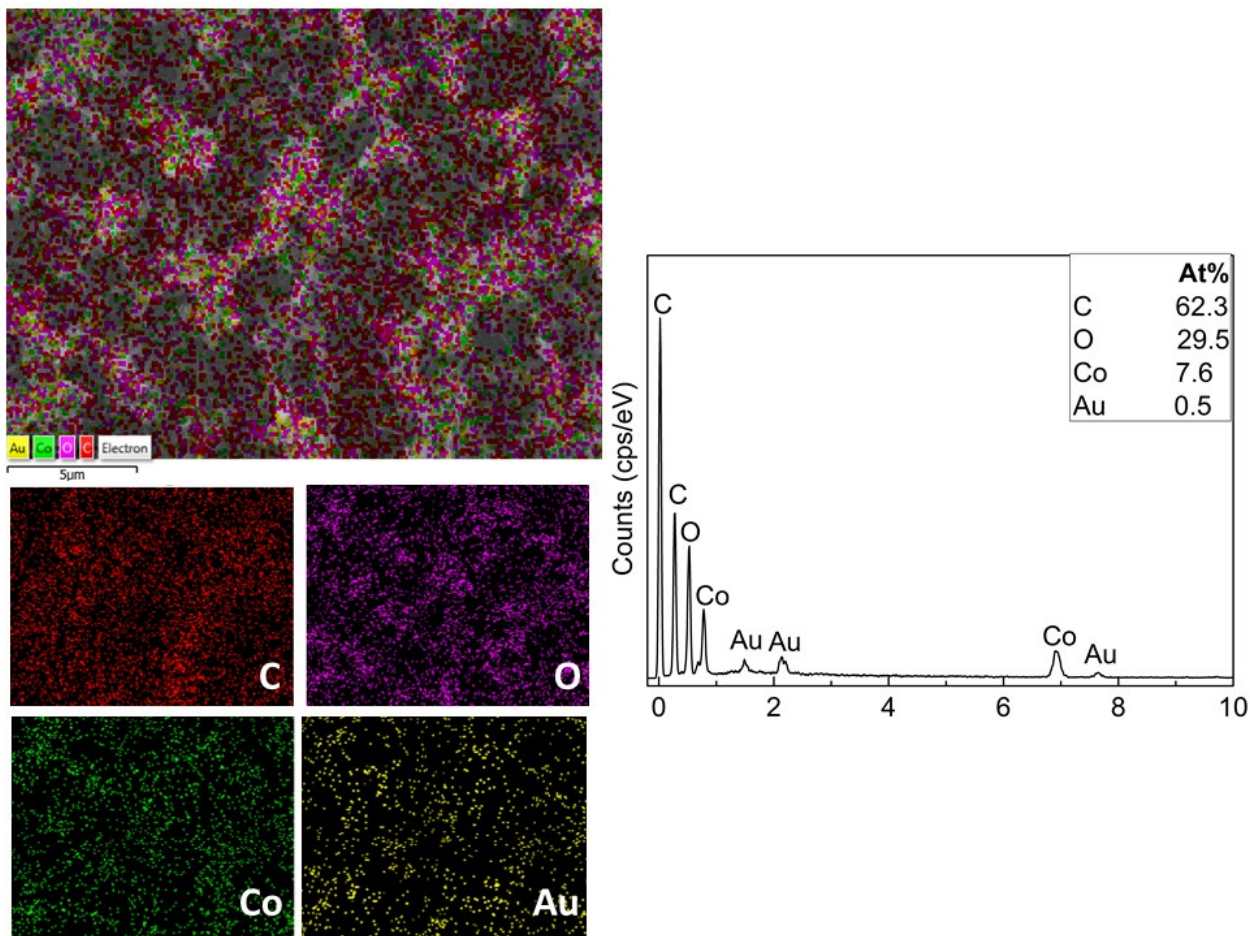

**Fig. S5:** SEM-EDS mapping of Au/Co(OH)<sub>2</sub> electrodeposited from 1 mM AuBr<sub>4</sub> - 10 mM Co(NO<sub>3</sub>)<sub>2</sub>·6H<sub>2</sub>O solution on a GC electrode for 150 sec at -1.05 V.



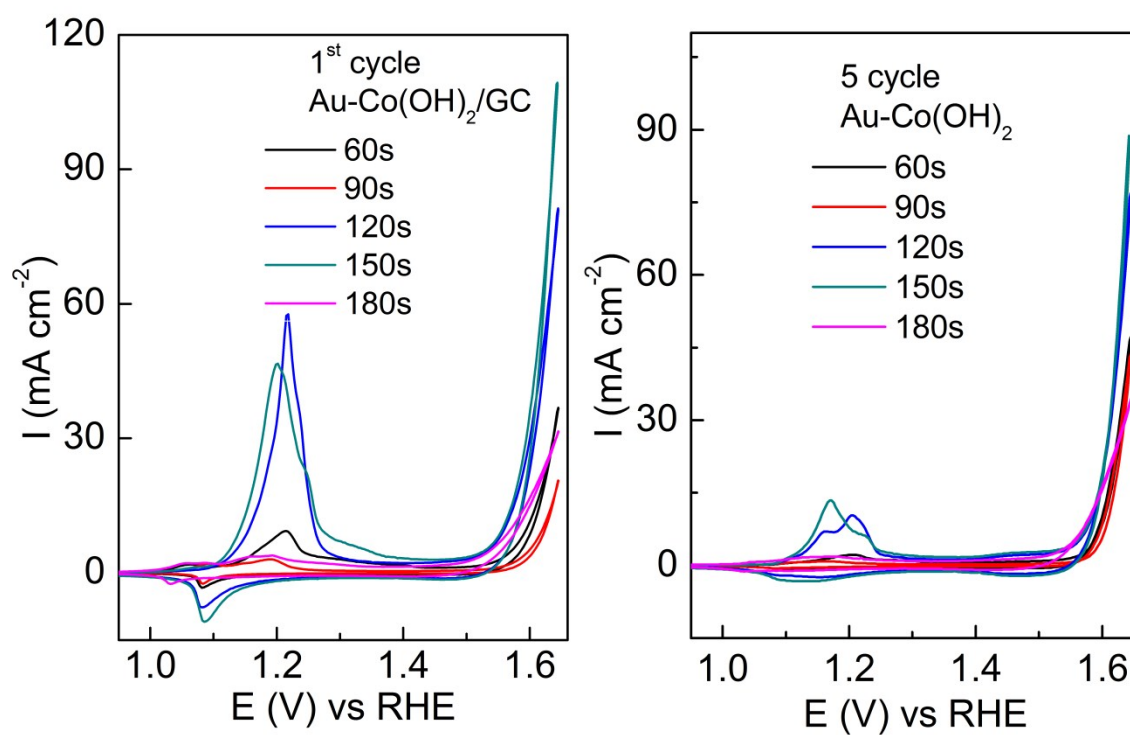

**Fig. S6:** Cyclic voltammograms recorded at Au-Co(OH)<sub>2</sub> electrodeposited on GC in 0.1 M NaOH recorded at 20 mV s<sup>-1</sup> showing the first cycle (left panel) and the fifth cycle (right panel) of time dependent OER performance.

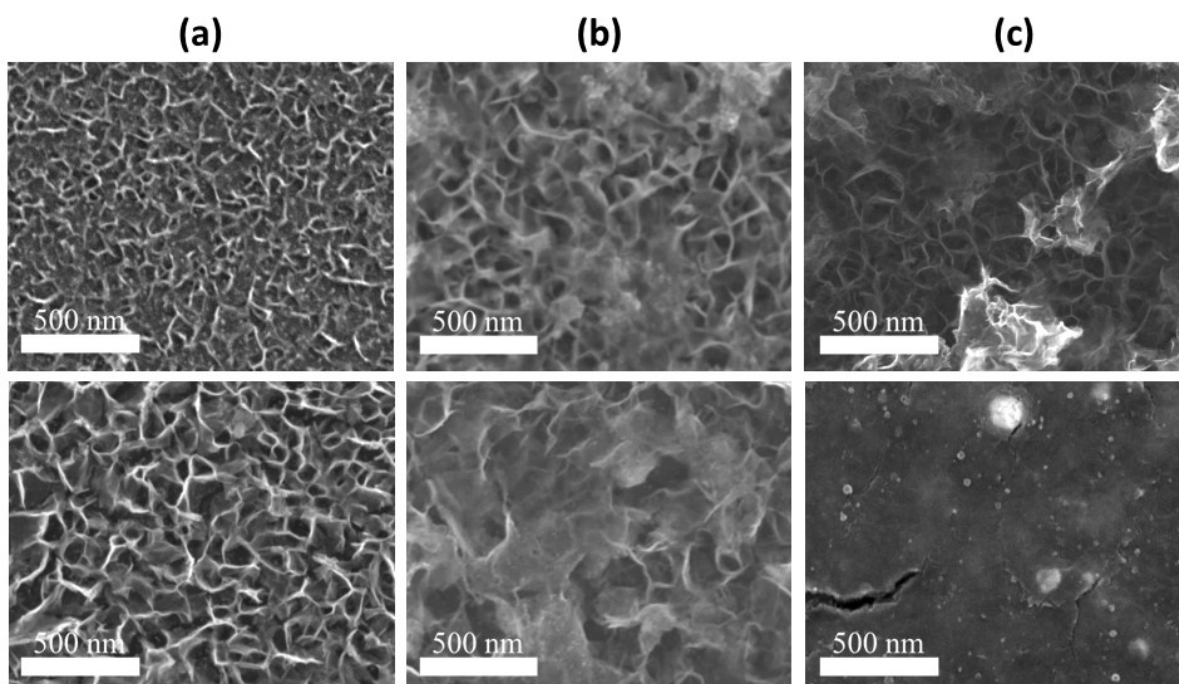

**Fig. S7.** SEM images of Au-Co(OH)<sub>2</sub>/GC electrodeposited film as a function of time where (a) 60 s, (b) 150 s and (c) 180 s at constant -1.05 V potential applied. SEM of as deposited film (first row) and after 5 cycles in OER region (second row).

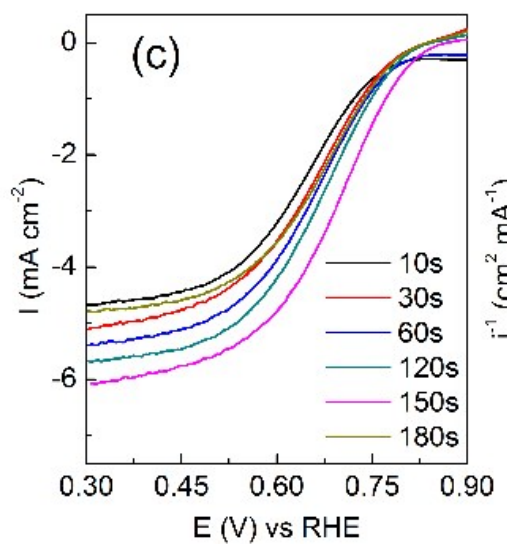

**Fig. S8.** ORR polarization curves recorded at 20 mV s<sup>-1</sup> in 0.1 M NaOH at 1500 rpm for Au/Co(OH)<sub>2</sub> electrodeposited from a solution of 1 mM KAuBr<sub>4</sub> and 10 mM Co(NO<sub>3</sub>)<sub>2</sub>·6H<sub>2</sub>O at -1.05 V for different times.

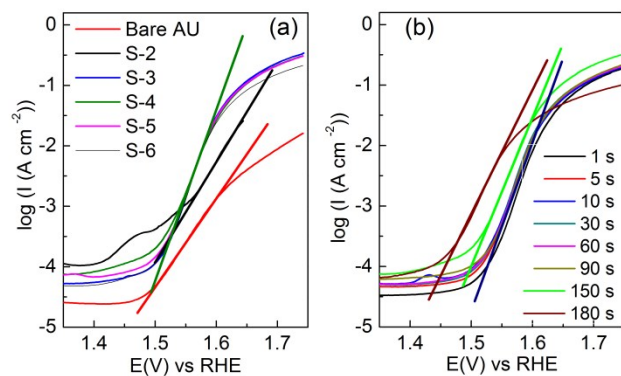

**Fig. S9.** Tafel plot recorded for the various samples (a) electrodeposited at -1.05 V for 150s and (b) at -1.05 V for S-4 at varying deposition periods. The cyclic voltammetric experiments used to obtain the data was recorded at a sweep rate of  $1 \text{ mV s}^{-1}$  in 0.1 M NaOH.

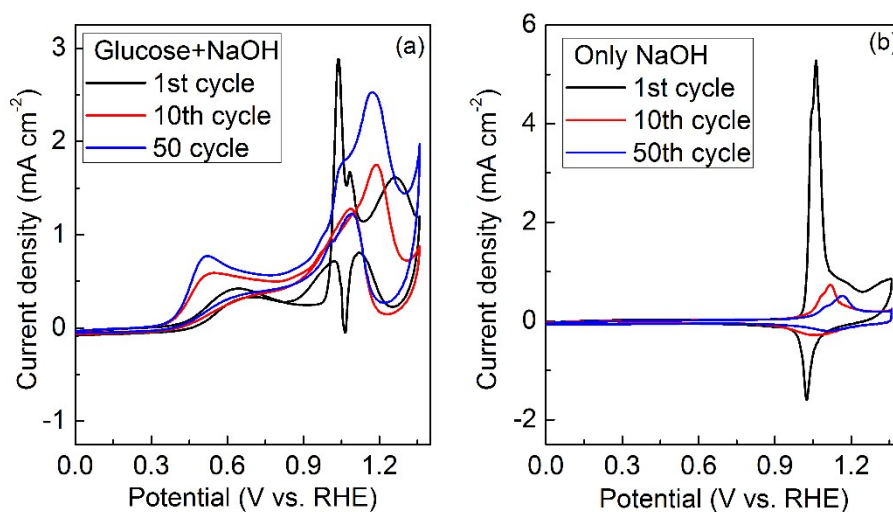

**Fig S10.** CV response for Au-Co(OH)<sub>2</sub>/GC for (a) 8 mM glucose + 0.5 M NaOH and (b) 0.5 M NaOH electrolytes.

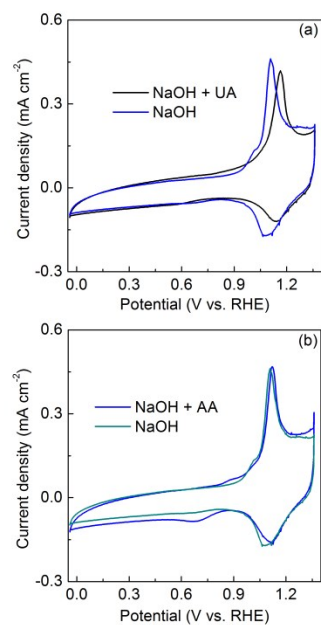

**Fig. S11.** CVs recorded at sample Au/Co(OH)<sub>2</sub>/GC at 50 mV s<sup>-1</sup> in 0.5 M NaOH containing (a) 0.33 mM UA and (b) 0.125 mM AA.
